# Supplementary material
Source: Springer Nature journal article supplement (https://www.springermedizin.de/resource/supplementary/12885_2012_3425_MOESM2_ESM.pdf/9462868)
Supplement: MOESM2 [file 9462868]

A.

### Ang-2 mRNA expression

Normalized fold expression

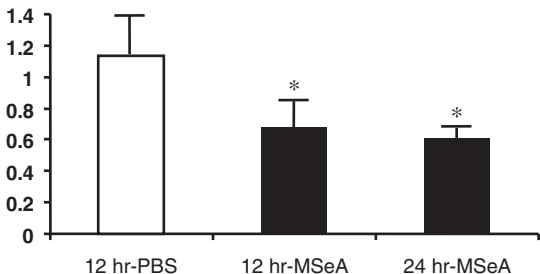

MSeA (5 $\mu$ M) treatment of MDA-MB-231 cells

B.

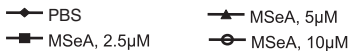

### Ang-2 protein secretion

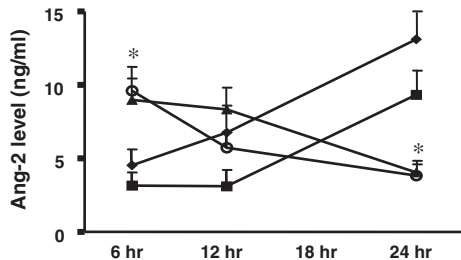

MSeA exposure of MDA-MB-231 cells
